# Supplementary material for: COVID-19 Vaccine Hesitancy in a City with Free Choice and Sufficient Doses
Source: MDPI journal article supplement (doi:10.3390/vaccines9111250), 2021-10-28
Supplement: s1 [file s1]

## File S1. Survey on Views about COVID-19 Vaccination

Hello, we are calling from Hong Kong Institute of Asia-Pacific Studies, CUHK. We are conducting a survey on views about COVID-19 vaccination. All information will be kept strictly confidential. This survey takes about ten minutes and it is taken voluntarily. You can withdraw from this survey anytime. If you have any enquiries, please contact us at 39436741. Do you agree to take the survey?

【Commission: The Jockey Club School of Public Health and Primary Care & Department of Microbiology, CUHK (Enquiry: Mr Chu 22528760)】

【If the respondent has done this survey, end the interview.】

### 【Landline survey】

L\_SEL To prevent bias at a certain groups of people, we need to perform random sampling. Except for domestic helpers, how many family members, including yourself, aged 18 or above live in this flat?

\_\_\_\_ people 【If there is more than one person, select the person who has his/her birthday next from all those present. If the selected person is not at home, please make an appointment to call again.】

### 【Mobile phone survey】

M\_SEL The target population of this survey is Hong Kong residents aged 18 or above. Do you belong to this group?

【If the respondent is not a Hong Kong resident, end the interview.】

### 【Survey starts】

#### GENDER

【Fill in by the interviewer. If it cannot be distinguished by voice, ask “What is your gender?”】

1. Male

7. Others

2. Female

9. Refuse to answer

AGE What age group do you belong to? Aged 18 - 29, 30 - 39, 40 - 49, 50 - 59, 60 - 69 · or aged 70 or above?

1. Aged 18 - 29

9. Refuse to answer

2. Aged 30 - 39

3. Aged 40 - 49
4. Aged 50 - 59
5. Aged 60 - 69
6. Aged 70 or above

Q1 How do you perceive your risk of being infected with COVID-19 in the coming 12 months? Very high, high, low or very low?

- |              |                         |
|--------------|-------------------------|
| 1. Very high | 8. Don't know/Uncertain |
| 2. High      | 9. Refuse to answer     |
| 3. Low       |                         |
| 4. Very low  |                         |

Q2 If you are infected with COVID-19, how serious do you think it will affect your health? Very serious, serious, not serious or not serious at all?

- |                       |                         |
|-----------------------|-------------------------|
| 1. Very serious       | 8. Don't know/Uncertain |
| 2. Serious            | 9. Refuse to answer     |
| 3. Not serious        |                         |
| 4. Not serious at all |                         |

Q3 How do you perceive the COVID-19 vaccine is effective to reduce disease severity and serious complications? Definitely, probably, probably not or definitely not?

- |                   |                         |
|-------------------|-------------------------|
| 1. Definitely     | 8. Don't know/Uncertain |
| 2. Probably       | 9. Refuse to answer     |
| 3. Probably not   |                         |
| 4. Definitely not |                         |

The following are some statements about the COVID-19 vaccination. How much do you agree with these statements? You can choose "strongly agree", "agree", "disagree" or "strongly disagree".

Q4 How much do you agree "vaccination is the most effective way to combat the COVID-19 pandemic"?

- |                      |                         |
|----------------------|-------------------------|
| 1. Strongly agree    | 8. Don't know/Uncertain |
| 2. Agree             | 9. Refuse to answer     |
| 3. Disagree          |                         |
| 4. Strongly disagree |                         |

Q5 How much do you agree "if more different types of vaccines are available, it allows me to choose the most suitable vaccine"?

- |                   |                         |
|-------------------|-------------------------|
| 1. Strongly agree | 8. Don't know/Uncertain |
| 2. Agree          | 9. Refuse to answer     |
| 3. Disagree       |                         |

4. Strongly disagree

Q6 How much do you agree “healthcare professionals should recommend the vaccine tailored to my health condition”?

1. Strongly agree

8. Don't know/Uncertain

2. Agree

9. Refuse to answer

3. Disagree

4. Strongly disagree

Q7 How much do you agree “the lack of comprehensive information on vaccines in the presence of more than one choice will lead to hesitancy to receive vaccines”?

1. Strongly agree

8. Don't know/Uncertain

2. Agree

9. Refuse to answer

3. Disagree

4. Strongly disagree

Q8 How much do you agree “the government should only provide one best vaccine to its citizens”?

1. Strongly agree

8. Don't know/Uncertain

2. Agree

9. Refuse to answer

3. Disagree

4. Strongly disagree

R1 If their health condition allows, do you support mandatory vaccination should be applied for the following categories of people? You can choose “strongly support”, “support”, “oppose” or “strongly oppose”.

Q9 How much do you support for “personnel working in hospitals and residential care homes”?

1. Strongly support

8. Don't know/Uncertain

2. Support

9. Refuse to answer

3. Oppose

4. Strongly oppose

Q10 How much do you support for “personnel working in service industry who require frequent contact with customers”?

1. Strongly support

8. Don't know/Uncertain

- 2. Support
- 3. Oppose
- 4. Strongly oppose

9. Refuse to answer

Q11 How much do you support for “personnel who provide public emergency services, e.g. police, firefighters”?

- 1. Strongly support
- 2. Support
- 3. Oppose
- 4. Strongly oppose

8. Don't know/Uncertain  
9. Refuse to answer

Q12 How much do you support for “foreign domestic helpers”?

- 1. Strongly support
- 2. Support
- 3. Oppose
- 4. Strongly oppose

8. Don't know/Uncertain  
9. Refuse to answer

Q13 How much do you support for “teachers”?

- 1. Strongly support
- 2. Support
- 3. Oppose
- 4. Strongly oppose

8. Don't know/Uncertain  
9. Refuse to answer

Q14 How much do you support the government should use cash as an incentive to encourage COVID-19 vaccination?

- 1. Strongly support 【To Q15】
- 2. Support 【To Q15】
- 3. Oppose 【To Q16】
- 4. Strongly oppose 【To Q16】

8. Don't know/Uncertain 【To Q16】  
9. Refuse to answer 【To Q16】

【 Available for respondents who choose option 1/2 in Q14 】

Q15 How much cash incentive is appropriate? \$100, \$300, \$500, \$700 or \$1,000?

- 1. \$100
- 2. \$300
- 3. \$500
- 4. \$700
- 5. \$1,000

7. Others (please specify)  
8. Don't know/Uncertain  
9. Refuse to answer

Q16 Have you received COVID-19 vaccine? (1) Never, (2) Completed two doses, (3) Received the first dose and will take the second dose or (4) Received the first dose but will not take the second dose

1. Never (including people who will book the vaccination) 【To Q17】
2. Completed two doses 【To Q39a】
3. Received the first dose and will take the second dose 【To Q39a】
4. Received the first dose but will not take the second dose 【To R2】
8. Don't know/Uncertain 【To Q17】
9. Refuse to answer 【To Q39b】

【Available for respondents who choose option 1 in Q16】

Q17 Are you planning to get the COVID-19 vaccine or make an appointment for vaccination in the future?

1. Yes/Have made an appointment 【To Q39a】
8. Don't know/Uncertain 【To R2】
2. No 【To R2】
9. Refuse to answer 【To Q39b】

【Available for respondents who choose option 4 in Q16 or option 2/8 in Q17】

R2 The following are some reasons for not getting the COVID-19 vaccine (or not getting the second dose of vaccine). Score 0 represents "no effect", score 5 represents "medium effect", and score 10 represents "the greatest effect", how much do the following reasons affect your willingness in vaccine uptake?

Q18 From 0 to 10, how do you score "having heard of cases with serious adverse events or death after vaccination" as barrier to you to get vaccinated?

\_\_\_\_\_ 【0-10: the higher the score, the greater the effect of the cause】

88. Don't know/Uncertain

99. Refuse to answer

Q19 From 0 to 10, how do you score "lack of confidence in the vaccine manufacturer and its country of origin" as barrier to you to get vaccinated?

\_\_\_\_\_ 【0-10: the higher the score, the greater the effect of the cause】

88. Don't know/Uncertain

99. Refuse to answer

Q20 From 0 to 10, how do you score "waiting for a better vaccine" as barrier to you to get vaccinated?

\_\_\_\_\_ 【0-10: the higher the score, the greater the effect of the cause】

88. Don't know/Uncertain

99. Refuse to answer

Q21 From 0 to 10, how do you score "confusing information about vaccines" as barrier to you to get vaccinated?

\_\_\_\_\_ 【0-10: the higher the score, the greater the effect of the cause】

88. Don't know/Uncertain

99. Refuse to answer

Q22 From 0 to 10, how do you score "lack of confidence in recommendations from HKSAR Government" as a barrier to you to get vaccinated?

\_\_\_\_\_ 【0-10: the higher the score, the greater the effect of the cause】

88. Don't know/Uncertain

99. Refuse to answer

Q23 From 0 to 10, how do you score "lack of confidence in the efficacy of vaccine" as a barrier to you to get vaccinated?

\_\_\_\_\_ 【0-10: the higher the score, the greater the effect of the cause】

88. Don't know/Uncertain

99. Refuse to answer

Q24 From 0 to 10, how do you score "inconvenient to go to vaccination venue" as a barrier to you to get vaccinated?

\_\_\_\_\_ 【0-10: the higher the score, the greater the effect of the cause】

88. Don't know/Uncertain

99. Refuse to answer

Q25 From 0 to 10, how do you score "current health condition not suitable" as a barrier to you to get vaccinated?

\_\_\_\_\_ 【0-10: the higher the score, the greater the effect of the cause】

88. Don't know/Uncertain

99. Refuse to answer

R3 The following are some strategies to encourage vaccine uptake among citizens. Score 0 represents "no effect", score 5 represents "medium effect", and

score 10 represents "the greatest effect", how much do the following strategies motivate you to get the COVID-19 vaccine?

Q26 From 0 to 10, how do you score "granting reasonable travel allowances" as a facilitator to you to get vaccinated?

\_\_\_\_\_ 【0-10: the higher the score, the greater the effect of the cause】

88. Don't know/Uncertain

99. Refuse to answer

Q27 From 0 to 10, how do you score "granting leaves on the day of vaccination and the day after" as a facilitator to you to get vaccinated?

\_\_\_\_\_ 【0-10: the higher the score, the greater the effect of the cause】

88. Don't know/Uncertain

99. Refuse to answer

Q28 From 0 to 10, how do you score "vaccine passports for overseas travel" as a facilitator to you to get vaccinated?

\_\_\_\_\_ 【0-10: the higher the score, the greater the effect of the cause】

88. Don't know/Uncertain

99. Refuse to answer

R4 It is assumed that "immunity passport" is implemented in Hong Kong to facilitate citizens in participation of certain activities or access to certain venues. Score 0 represents "no effect", score 5 represents "medium effect", and score 10 represents "the greatest effect", how much do following relaxation of social distancing measures motivate you to get the COVID-19 vaccine?

Q29 From 0 to 10, how do you score "relaxing restrictions on religious activities" as a facilitator to you to get vaccinated?

\_\_\_\_\_ 【0-10: the higher the score, the greater the effect of the cause】

88. Don't know/Uncertain

99. Refuse to answer

Q30 From 0 to 10, how do you score "relaxing restrictions on visiting policies in hospitals and healthcare facilities" as a facilitator to you to get vaccinated?

\_\_\_\_\_ 【0-10: the higher the score, the greater the effect of the cause】



88. Don't know/Uncertain

99. Refuse to answer

Q31 From 0 to 10, how do you score "relaxing mandatory quarantine" as a facilitator to you to get vaccinated?

\_\_\_\_\_ 【0-10: the higher the score, the greater the effect of the cause】

88. Don't know/Uncertain

99. Refuse to answer

Q32 From 0 to 10, how do you score "resumption of face-to-face teaching in schools" as a facilitator to you to get vaccinated?

\_\_\_\_\_ 【0-10: the higher the score, the greater the effect of the cause】

88. Don't know/Uncertain

99. Refuse to answer

Q33 From 0 to 10, how do you score "allowing to enter entertainment venues, such as restaurants, fitness rooms, sports fields, swimming pools, bars and karaoke box, etc." as a facilitator to you to get vaccinated?

\_\_\_\_\_ 【0-10: the higher the score, the greater the effect of the cause】

88. Don't know/Uncertain

99. Refuse to answer

R5 The following are the advices from different parties. Score 0 represents "no effect", score 5 represents "medium effect", and score 10 represents "the greatest effect", how much do the advice of the following parties as a facilitator to you to get vaccinated?

Q34 From 0 to 10, how do you score "recommendation by doctors" as a facilitator to you to get vaccinated?

\_\_\_\_\_ 【0-10: the higher the score, the greater the effect of the cause】

88. Don't know/Uncertain

99. Refuse to answer

Q35 From 0 to 10, how do you score "recommendation by family members or relatives" as a facilitator to you to get vaccinated?

\_\_\_\_\_ 【0-10: the higher the score, the greater the effect of the cause】

88. Don't know/Uncertain

99. Refuse to answer

Q36 From 0 to 10, how do you score "recommendation by colleagues and friends" as a facilitator to you to get vaccinated?

\_\_\_\_\_ 【0-10: the higher the score, the greater the effect of the cause】

88. Don't know/Uncertain

99. Refuse to answer

Q37 From 0 to 10, how do you score "recommendation by employers" as a facilitator to you to get vaccinated?

\_\_\_\_\_ 【0-10: the higher the score, the greater the effect of the cause】

88. Don't know/Uncertain

99. Refuse to answer

Q38 From 0 to 10, how do you score "recommendation by the government" as a facilitator to you to get vaccinated?

\_\_\_\_\_ 【0-10: the higher the score, the greater the effect of the cause】

88. Don't know/Uncertain

99. Refuse to answer

【Available for respondents who have received one or two doses, or have booked the vaccination (choose option 2/3/4 in Q16)】

Q39a Which COVID-19 vaccines have you received (or plan to receive in the future)? Sinovac or BioNTech?

1. Sinovac

8. Not yet decided

2. BioNTech

9. Refuse to answer

【Available for respondents who have not vaccinated (choose option 1/9 in Q16 or choose option 2/8 in Q17)】

Q39b If you have to get your vaccine, which COVID-19 vaccine will you choose? Sinovac or BioNTech?

1. Sinovac

8. Not yet decided/Don't

know/Uncertain

2. BioNTech

9. Refuse to answer

3. Wait for a better vaccine

Q40 Do you know the difference between the two COVID-19 vaccines (Sinovac and BioNTech)? Fully understand, understand, do not understand or not understand at all?

- |                          |                         |
|--------------------------|-------------------------|
| 1. Fully understand      | 8. Don't know/Uncertain |
| 2. Understand            | 9. Refuse to answer     |
| 3. Do not understand     |                         |
| 4. Not understand at all |                         |

R5 Score 0 represents "no effect", score 5 represents "medium effect", and score 10 represents "the greatest effect", how much do the following factors affect your preference in choosing COVID-19 vaccine?

Q41 From 0 to 10, how do you score "vaccine efficacy" as a factor influencing your choice of vaccine?

\_\_\_\_\_ 【0-10: the higher the score, the greater the effect of the cause】

88. Don't know/Uncertain

99. Refuse to answer

Q42 From 0 to 10, how do you score "adverse effects after vaccination" as a factor influencing your choice of vaccine?

\_\_\_\_\_ 【0-10: the higher the score, the greater the effect of the cause】

88. Don't know/Uncertain

99. Refuse to answer

Q43 From 0 to 10, how do you score "death cases after vaccination" as a factor influencing your choice of vaccine?

\_\_\_\_\_ 【0-10: the higher the score, the greater the effect of the cause】

88. Don't know/Uncertain

99. Refuse to answer

Q44 From 0 to 10, how do you score "vaccine manufacturing technology (e.g. traditional or new approach)" as a factor influencing your choice of vaccine?

\_\_\_\_\_ 【0-10: the higher the score, the greater the effect of the cause】

88. Don't know/Uncertain

99. Refuse to answer

Q45 From 0 to 10, how do you score "country of origin" as a factor influencing your choice of vaccine?

\_\_\_\_\_ 【0-10: the higher the score, the greater the effect of the cause】

88. Don't know/Uncertain

99. Refuse to answer

Q46 From 0 to 10, how do you score "convenience in overseas travels (e.g. being accepted by foreign countries)" as a factor influencing your choice of vaccine?

\_\_\_\_\_ 【0-10: the higher the score, the greater the effect of the cause】

88. Don't know/Uncertain

99. Refuse to answer

Q47 From 0 to 10, how do you score "choices made by experts" as a factor influencing your choice of vaccine? 【e.g. the vaccine received by experts】

\_\_\_\_\_ 【0-10: the higher the score, the greater the effect of the cause】

88. Don't know/Uncertain

99. Refuse to answer

Q48 From 0 to 10, how do you score "choices made by government officials" as a factor influencing your choice of vaccine? 【e.g. the vaccine received by government officials】

\_\_\_\_\_ 【0-10: the higher the score, the greater the effect of the cause】

88. Don't know/Uncertain

99. Refuse to answer

Q49 From 0 to 10, how do you score "choices made by healthcare workers" as a factor influencing your choice of vaccine?

\_\_\_\_\_ 【0-10: the higher the score, the greater the effect of the cause】

88. Don't know/Uncertain

99. Refuse to answer

Q50 From 0 to 10, how do you score "choices made by family, friends, and colleagues" as a factor influencing your choice of vaccine?

\_\_\_\_\_ 【0-10: the higher the score, the greater the effect of the cause】

88. Don't know/Uncertain

99. Refuse to answer

Q51 From 0 to 10, how do you score "advice from key opinion leaders (KOL) on the internet" as a factor influencing your choice of vaccine?

\_\_\_\_\_ 【0-10: the higher the score, the greater the effect of the cause】

88. Don't know/Uncertain

99. Refuse to answer

Q52 Do you require use of chronic medications?

1. Yes

8. Don't know/Uncertain

2. No

9. Refuse to answer

Q53 Do you know any person in your social circle diagnosed with COVID-19?

1. Yes

8. Don't know/Uncertain

2. No

9. Refuse to answer

Q54 Have you been diagnosed with COVID-19?

1. Yes

8. Don't know/Uncertain

2. No

9. Refuse to answer

EDU

What is your highest level of education? Primary or below, secondary, tertiary level or above

1. Primary or below

9. Refuse to answer

2. Secondary (Form 1 -7/matriculation)

3. Tertiary level or above (diploma, higher diploma, associate degree, bachelor's degree, master's degree, doctoral degree)

#### WORK

What is your employment status?

1. Employed (full-time/part-time) 【To INDUST1】
2. Not in employment 【To SUBSIDE】
9. Refuse to answer 【To SUBSIDE】

【 Available for respondents who are employed 】

INDUST1 What field are you in? 【 Don't read the field 】

1. Manufacturing (e.g. food, clothing, printing, plastic, metal, furniture, chemical manufacturing, etc.)
2. Electricity, gas supply, waste recycling
3. Construction (construction, renovation, civil engineering, etc.)
4. Import/export, wholesale and retail trades
5. Transportation, storage, postal and courier services (driver, air transportation, warehouse, logistics, etc.)
6. Accommodation and food services (hotels, catering, etc.)
7. Publishing, film, recording, programming and broadcasting
8. Information and communications (Telecommunications, IT, Internet, etc.)
9. Financial and insurance (banking, investments, retirement funds, etc.)
10. Real estate (real estate trading, property management, etc.)
11. Professional, scientific and technical services (law, accounting, public relations, surveying, scientific research, design, etc.)
12. Administration and support services (rental and leasing, employment, tourism, security, office administration)
13. Public administration (civil servant, assistants of Legislative Council/District Councils Members)
14. Education (schools, teaching, tutorial schools)
15. Healthcare (hospitals, nursing) (e.g. doctors, nurses, first-aiders)
16. Social welfare and social work services (e.g. non-profit organizations or charitable organizations)
17. Arts, entertainment, recreation or other cultural activities (art, library, sports, societies, religion, etc.)
18. Maintenance and other personal services (repair of motor vehicles, home maintenance, laundry, beauty, private tutoring)
77. Others 【 please specify 】
99. Refuse to answer

【 Available for respondents who are employed 】

INDUST2 Do you encounter 50 or more people in workplace every day?

- |        |                         |
|--------|-------------------------|
| 1. Yes | 8. Don't know/Uncertain |
| 2. No  | 9. Refuse to answer     |

【 Available for respondents who are employed 】

INCOME Comparison of before and after COVID-19, how does the pandemic affect your current monthly income? No impact, increase or decrease?

【 If there is a decrease, ask follow-up question: what is the percentage of decrease?

10%, 10% to less than 30%, 30% to less than 50%, 50% or above 】

- |                                   |                         |
|-----------------------------------|-------------------------|
| 1. No impact                      | 8. Don't know/Uncertain |
| 2. Increase                       | 9. Refuse to answer     |
| 3. Decrease: less than 10%        |                         |
| 4. Decrease: 10% to less than 30% |                         |
| 5. Decrease: 30% to less than 50% |                         |
| 6. Decrease: 50% or above         |                         |

SUBSIDE Do you receive any allowance (e.g. Comprehensive Social Security Assistance Scheme, Disability Allowance, Old Age Allowance, etc.) from the HKSAR Government?

- |        |                     |
|--------|---------------------|
| 1. Yes | 9. Refuse to answer |
| 2. No  |                     |

\*\* This is the end of the survey. Thank you for your time, goodbye! \*\*



Table S1. Status and perceptions towards COVID-19 vaccine

|                                                                                       | Age Groups (years) |              |                 |              |                       |              | Total  |              | <i>P</i> * |
|---------------------------------------------------------------------------------------|--------------------|--------------|-----------------|--------------|-----------------------|--------------|--------|--------------|------------|
|                                                                                       | 18-39<br>Number    | Percentage   | 40-59<br>Number | Percentage   | 60 or above<br>Number | Percentage   | Number | Percentage   |            |
| <b>Have you received COVID-19 vaccine?</b>                                            |                    |              |                 |              |                       |              |        |              | <0.001     |
| No                                                                                    | 308                | 81.4%        | 321             | 74.2%        | 272                   | 70.9%        | 901    | <b>75.4%</b> |            |
| Yes, two doses                                                                        | 22                 | 5.8%         | 68              | 15.6%        | 71                    | 18.7%        | 161    | <b>13.5%</b> |            |
| Yes, one dose                                                                         | 44                 | 11.6%        | 44              | 10.2%        | 33                    | 8.6%         | 121    | <b>10.1%</b> |            |
| Unsure                                                                                | 4                  | 0.9%         | 0               | 0.0%         | 7                     | 1.9%         | 11     | 0.9%         |            |
| Missing                                                                               | 1                  | 0.3%         | 0               | 0.0%         | 0                     | 0.0%         | 1      | 0.1%         |            |
| <b>Do you intent to receive the vaccine within the coming 6 months?</b>               |                    |              |                 |              |                       |              |        |              | <0.001     |
| Yes                                                                                   | 69                 | <b>22.2%</b> | 95              | <b>29.5%</b> | 65                    | <b>23.3%</b> | 229    | <b>25.1%</b> |            |
| No                                                                                    | 187                | 59.9%        | 149             | 46.5%        | 121                   | 43.6%        | 458    | 50.2%        |            |
| Unsure                                                                                | 56                 | 17.9%        | 77              | 24.0%        | 92                    | 33.1%        | 225    | 24.7%        |            |
| Missing                                                                               | 0                  | 0.0%         | 0               | 0.0%         | 0                     | 0.0%         | 0      | 0.0%         |            |
| <b>Which vaccine did you choose (Sinovac or BioNTech)?</b>                            |                    |              |                 |              |                       |              |        |              | <0.001     |
| Sinovac                                                                               | 37                 | 27.2%        | 94              | 45.4%        | 92                    | 54.1%        | 222    | <b>43.5%</b> |            |
| BioNTech                                                                              | 90                 | 66.6%        | 90              | 43.7%        | 59                    | 35.1%        | 240    | <b>46.9%</b> |            |
| Unsure                                                                                | 7                  | 5.5%         | 17              | 8.2%         | 11                    | 6.8%         | 36     | 7.0%         |            |
| Missing                                                                               | 1                  | 0.7%         | 6               | 2.7%         | 7                     | 4.0%         | 13     | 2.6%         |            |
| <b>How do you perceive your risk of contracting COVID-19 in the coming 12 months?</b> |                    |              |                 |              |                       |              |        |              | <0.001     |
| High                                                                                  | 48                 | 12.6%        | 64              | 14.9%        | 61                    | 16.0%        | 173    | 14.5%        |            |
| Low                                                                                   | 311                | <b>81.9%</b> | 327             | <b>75.4%</b> | 246                   | <b>64.3%</b> | 884    | <b>73.9%</b> |            |

|         |    |      |    |      |    |       |     |       |
|---------|----|------|----|------|----|-------|-----|-------|
| Unsure  | 21 | 5.5% | 42 | 9.7% | 75 | 19.7% | 138 | 11.6% |
| Missing | 0  | 0.0% | 0  | 0.0% | 0  | 0.0%  | 0   | 0.0%  |

**Do you perceive COVID-19 as a severe disease?** <0.001

|         |     |       |     |       |     |       |     |              |
|---------|-----|-------|-----|-------|-----|-------|-----|--------------|
| Yes     | 257 | 67.8% | 300 | 69.3% | 270 | 70.5% | 827 | <b>69.2%</b> |
| No      | 105 | 27.8% | 94  | 21.7% | 62  | 16.2% | 262 | 21.9%        |
| Unsure  | 17  | 4.4%  | 39  | 9.0%  | 51  | 13.2% | 106 | 8.9%         |
| Missing | 0   | 0.0%  | 0   | 0.0%  | 0   | 0.0%  | 0   | 0.0%         |

**Do you perceive the COVID-19 vaccine is effective to reduce disease severity or serious complications?** <0.001

|         |     |       |     |       |     |       |     |              |
|---------|-----|-------|-----|-------|-----|-------|-----|--------------|
| Yes     | 239 | 62.9% | 301 | 69.8% | 247 | 64.4% | 787 | <b>65.9%</b> |
| No      | 117 | 30.8% | 85  | 19.7% | 70  | 18.3% | 272 | 22.7%        |
| Unsure  | 24  | 6.3%  | 46  | 10.5% | 66  | 17.4% | 136 | 11.4%        |
| Missing | 0   | 0.0%  | 0   | 0.0%  | 0   | 0.0%  | 0   | 0.0%         |

**Do you agree "vaccination is the most effective strategy to combat the COVID-19 pandemic"?** <0.001

|         |     |              |     |       |     |              |     |              |
|---------|-----|--------------|-----|-------|-----|--------------|-----|--------------|
| Yes     | 192 | <b>50.7%</b> | 277 | 63.9% | 250 | <b>65.3%</b> | 719 | <b>60.2%</b> |
| No      | 178 | 47.0%        | 138 | 31.9% | 99  | 25.8%        | 415 | 34.7%        |
| Unsure  | 9   | 2.3%         | 17  | 4.0%  | 32  | 8.4%         | 58  | 4.8%         |
| Missing | 0   | 0.0%         | 1   | 0.2%  | 2   | 0.6%         | 3   | 0.3%         |

**Do you agree "there should be more than one vaccine for you to choose from"?** 0.114

|        |     |       |     |       |     |       |     |              |
|--------|-----|-------|-----|-------|-----|-------|-----|--------------|
| Yes    | 295 | 77.7% | 342 | 78.9% | 311 | 81.1% | 947 | <b>79.2%</b> |
| No     | 75  | 19.8% | 73  | 16.9% | 52  | 13.7% | 201 | 16.8%        |
| Unsure | 9   | 2.5%  | 18  | 4.2%  | 20  | 5.2%  | 47  | 4.0%         |

|                                                                                                                                                             |     |              |     |       |     |       |     |              |        |
|-------------------------------------------------------------------------------------------------------------------------------------------------------------|-----|--------------|-----|-------|-----|-------|-----|--------------|--------|
| Missing                                                                                                                                                     | 0   | 0.0%         | 0   | 0.0%  | 0   | 0.0%  | 0   | 0.0%         |        |
| <b>Do you agree "healthcare professionals should recommend the vaccine tailored to your health condition"?</b>                                              |     |              |     |       |     |       |     |              | 0.066  |
| Yes                                                                                                                                                         | 290 | 76.4%        | 314 | 72.6% | 285 | 74.4% | 889 | <b>74.4%</b> |        |
| No                                                                                                                                                          | 72  | 19.0%        | 98  | 22.6% | 66  | 17.3% | 236 | 19.8%        |        |
| Unsure                                                                                                                                                      | 17  | 4.6%         | 21  | 4.8%  | 32  | 8.3%  | 70  | 5.9%         |        |
| Missing                                                                                                                                                     | 0   | 0.0%         | 0   | 0.0%  | 0   | 0.0%  | 0   | 0.0%         |        |
| <b>Do you agree "the lack of comprehensive information on vaccines in the presence of more than one choice will lead to hesitancy to receive vaccines"?</b> |     |              |     |       |     |       |     |              | 0.025  |
| Yes                                                                                                                                                         | 299 | 79.0%        | 322 | 74.4% | 271 | 70.8% | 892 | <b>74.7%</b> |        |
| No                                                                                                                                                          | 71  | 18.7%        | 95  | 22.0% | 87  | 22.8% | 254 | 21.2%        |        |
| Unsure                                                                                                                                                      | 9   | 2.3%         | 16  | 3.6%  | 25  | 6.5%  | 49  | 4.1%         |        |
| Missing                                                                                                                                                     | 0   | 0.0%         | 0   | 0.0%  | 0   | 0.0%  | 0   | 0.0%         |        |
| <b>Do you agree "the government should only provide one best vaccine to its citizens"?</b>                                                                  |     |              |     |       |     |       |     |              | <0.001 |
| Yes                                                                                                                                                         | 28  | 7.5%         | 59  | 13.6% | 92  | 24.0% | 179 | 15.0%        |        |
| No                                                                                                                                                          | 345 | <b>90.9%</b> | 364 | 84.0% | 261 | 68.2% | 970 | <b>81.1%</b> |        |
| Unsure                                                                                                                                                      | 6   | 1.6%         | 9   | 2.2%  | 28  | 7.3%  | 43  | 3.7%         |        |
| Missing                                                                                                                                                     | 0   | 0.0%         | 1   | 0.2%  | 2   | 0.5%  | 3   | 0.3%         |        |
| <b>Do you support compulsory vaccination for personnel working in hospitals and institutions if their health condition allows?</b>                          |     |              |     |       |     |       |     |              | <0.001 |
| Yes                                                                                                                                                         | 156 | 41.3%        | 227 | 52.5% | 213 | 55.6% | 597 | <b>49.9%</b> |        |
| No                                                                                                                                                          | 209 | 55.3%        | 189 | 43.7% | 147 | 38.4% | 546 | 45.7%        |        |

|         |    |      |    |      |    |      |    |      |
|---------|----|------|----|------|----|------|----|------|
| Unsure  | 13 | 3.5% | 16 | 3.8% | 23 | 6.0% | 52 | 4.4% |
| Missing | 0  | 0.0% | 0  | 0.0% | 0  | 0.0% | 0  | 0.0% |

**Do you support compulsory vaccination for people requiring frequent contact with others if their health condition allows?** <0.001

|         |     |       |     |       |     |       |     |              |
|---------|-----|-------|-----|-------|-----|-------|-----|--------------|
| Yes     | 142 | 37.5% | 218 | 50.4% | 232 | 60.6% | 592 | <b>49.6%</b> |
| No      | 223 | 58.9% | 204 | 47.0% | 133 | 34.7% | 560 | 46.8%        |
| Unsure  | 14  | 3.6%  | 12  | 2.7%  | 18  | 4.7%  | 43  | 3.6%         |
| Missing | 0   | 0.0%  | 0   | 0.0%  | 0   | 0.0%  | 0   | 0.0%         |

**Do you support compulsory vaccination for essential service providers, such as policemen and firemen if their health condition allows?** <0.001

|         |     |       |     |       |     |       |     |              |
|---------|-----|-------|-----|-------|-----|-------|-----|--------------|
| Yes     | 195 | 51.5% | 247 | 57.0% | 267 | 69.8% | 709 | <b>59.3%</b> |
| No      | 177 | 46.8% | 167 | 38.6% | 93  | 24.4% | 438 | 36.6%        |
| Unsure  | 6   | 1.7%  | 19  | 4.5%  | 22  | 5.8%  | 48  | 4.0%         |
| Missing | 0   | 0.0%  | 0   | 0.0%  | 0   | 0.0%  | 0   | 0.0%         |

**Do you support compulsory vaccination for foreign domestic helpers if their health condition allows?** <0.001

|         |     |       |     |       |     |       |     |              |
|---------|-----|-------|-----|-------|-----|-------|-----|--------------|
| Yes     | 156 | 41.2% | 225 | 51.9% | 230 | 59.9% | 611 | <b>51.1%</b> |
| No      | 216 | 57.1% | 190 | 43.9% | 125 | 32.6% | 531 | 44.5%        |
| Unsure  | 7   | 1.7%  | 18  | 4.2%  | 29  | 7.5%  | 53  | 4.5%         |
| Missing | 0   | 0.0%  | 0   | 0.0%  | 0   | 0.0%  | 0   | 0.0%         |

**Do you support compulsory vaccination for teachers if their health condition allows?** <0.001

|     |     |       |     |       |     |       |     |              |
|-----|-----|-------|-----|-------|-----|-------|-----|--------------|
| Yes | 112 | 29.5% | 189 | 43.6% | 198 | 51.6% | 498 | <b>41.7%</b> |
| No  | 257 | 67.9% | 221 | 51.1% | 158 | 41.2% | 637 | 53.3%        |

|                                                                                                                |     |       |     |       |     |       |     |        |
|----------------------------------------------------------------------------------------------------------------|-----|-------|-----|-------|-----|-------|-----|--------|
| Unsure                                                                                                         | 10  | 2.6%  | 23  | 5.3%  | 28  | 7.2%  | 60  | 5.0%   |
| Missing                                                                                                        | 0   | 0.0%  | 0   | 0.0%  | 0   | 0.0%  | 0   | 0.0%   |
| <b>Do you agree the government should use cash as an incentive to encourage COVID-19 vaccination?</b>          |     |       |     |       |     |       |     | <0.001 |
| Yes                                                                                                            | 102 | 26.9% | 105 | 24.2% | 112 | 29.3% | 319 | 26.7%  |
| No                                                                                                             | 272 | 71.8% | 323 | 74.7% | 242 | 63.1% | 837 | 70.1%  |
| Unsure                                                                                                         | 4   | 1.0%  | 5   | 1.1%  | 29  | 7.6%  | 38  | 3.2%   |
| Missing                                                                                                        | 1   | 0.2%  | 0   | 0.0%  | 0   | 0.0%  | 1   | 0.1%   |
| <b>How much cash incentive do you think is appropriate (for those who respond “Yes” to previous question)?</b> |     |       |     |       |     |       |     | 0.003  |
| \$100                                                                                                          | 9   | 8.6%  | 11  | 10.8% | 11  | 9.8%  | 31  | 9.8%   |
| \$300                                                                                                          | 11  | 10.9% | 10  | 9.4%  | 4   | 3.8%  | 25  | 7.9%   |
| \$500                                                                                                          | 20  | 19.4% | 23  | 21.8% | 19  | 16.6% | 61  | 19.2%  |
| \$700                                                                                                          | 10  | 9.3%  | 4   | 3.7%  | 11  | 9.6%  | 24  | 7.6%   |
| \$1,000                                                                                                        | 46  | 44.7% | 42  | 40.3% | 35  | 30.8% | 123 | 38.4%  |
| Others                                                                                                         | 3   | 2.9%  | 7   | 6.6%  | 10  | 9.1%  | 20  | 6.3%   |
| Unsure                                                                                                         | 4   | 4.1%  | 8   | 7.5%  | 23  | 20.4% | 35  | 11.0%  |
| Missing                                                                                                        | 0   | 0.0%  | 0   | 0.0%  | 0   | 0.0%  | 0   | 0.0%   |

\*P values were generated from the Chi-Square tests comparing the difference in proportions between age groups.
